# Supplementary material for: Association between Coagulation Profile and Clinical Outcome in Children with SARS-CoV-2 Infection or MIS-C: A Multicenter Cross-Sectional Study
Source: MDPI journal article supplement (doi:10.3390/children9020279), 2022-02-17
Supplement: s1 [file s1]

## SUPPLEMENTARY MATERIAL

**Table S1.** Comorbidities in the study population.

| COMORBIDITIES                 | N  |
|-------------------------------|----|
| Neurological pathologies      | 12 |
| Hematological pathologies     | 8  |
| Rheumatological pathologies   | 2  |
| Asthma                        | 9  |
| Other pulmonary pathologies   | 9  |
| Metabolically pathologies     | 3  |
| Cardiological pathologies     | 6  |
| Diabetes                      | 4  |
| Genetical pathologies         | 8  |
| Oncological pathologies       | 10 |
| Obesity                       | 12 |
| Nephro-urological pathologies | 4  |
| Otolaryngological pathologies | 3  |
| Others                        | 23 |

**Table S2.** Laboratory exams at 24, 48 and 72 hours form the diagnosis.

|                            | 24h              | 48h                | 72h              |
|----------------------------|------------------|--------------------|------------------|
| <b>D-dimer</b>             |                  |                    |                  |
| Yes                        | 21 (6,6%)        | 40 (12,7%)         | 25 (7,9%)        |
| <b>D-dimers dosage</b>     |                  |                    |                  |
| Media (DS)                 |                  |                    |                  |
| Median (IQR)               | 1,49 (0,75-3,19) | 1,48 (0,71-4,34)   | 1,75 (1,11-5,15) |
| <b>D-dimers altered</b>    |                  |                    |                  |
| Yes                        | 16 (76,2%)       | 32 (80%)           | 23 (92%)         |
| <b>Fibrinogen</b>          |                  |                    |                  |
| Yes                        | 19 (6%)          | 36 (11,4%)         | 24 (7,6%)        |
| <b>Fibrinogen</b>          |                  |                    |                  |
| Media (DS)                 | ...              | ...                | 351,04 (149,68)  |
| Median (IQR)               | 299 (213-582)    | 346 (250,25-457)   | ...              |
| <b>Hyperfibrinogenemia</b> |                  |                    |                  |
| Yes                        | 8 (42,1%)        | 13 (36,1%)         | 8 (33,3%)        |
| <b>Hypofibrinogenemia</b>  |                  |                    |                  |
| Yes                        | 2 (10,5%)        | 3 (8,3%)           | 1 (4,2%)         |
| <b>Fibrinogen altered</b>  |                  |                    |                  |
| Yes                        | 10 (52,6%)       | 16 (44,4%)         | 9 (37,5%)        |
| <b>Coagulation exams</b>   |                  |                    |                  |
| Yes                        | 20 (6,3%)        | 34 (10,8%)         | 18 (5,7%)        |
| <b>INR</b>                 |                  |                    |                  |
| Media (DS)                 | ...              | ...                | ...              |
| Median (IQR)               | 1,08 (1,02-1,15) | 1,03 (1-1,15)      | 1,05 (0,93-1,15) |
| <b>aPTT</b>                |                  |                    |                  |
| Media (DS)                 | 35,41 (7,47)     | ...                | 32,92 (6,21)     |
| Median (IQR)               | ...              | 30,5 (26,97-34,62) | ...              |
| <b>Platelets</b>           |                  |                    |                  |
| Yes                        | 18 (5,7%)        | 32 (10,1%)         | 23 (7,3%)        |

|                                                     |                     |                      |                     |
|-----------------------------------------------------|---------------------|----------------------|---------------------|
| <b>Platelets' count x10<sup>9</sup> per L</b>       |                     |                      |                     |
| Media (DS)                                          | 281,9 (157,5-356,0) | ...                  | ...                 |
| Median (IQR)                                        | ...                 | 301,0 (209,2-453,75) | 301,0 (226,0-452,0) |
| <b>Platelets altered</b>                            |                     |                      |                     |
| Yes                                                 | 5 (27,8%)           | 13 (40,6%)           | 6 (26,1%)           |
| <b>Thrombocytopenia</b>                             |                     |                      |                     |
| Yes                                                 | 3 (16,7%)           | 3 (9,4%)             | 0 (0%)              |
| <b>Thrombocytosis</b>                               |                     |                      |                     |
| Yes                                                 | 2 (11,1%)           | 8 (25%)              | 6 (26,1%)           |
| <b>Blood cell count</b>                             |                     |                      |                     |
| Yes                                                 | 15 (4,7%)           | 31 (9,8%)            | 23 (7,3%)           |
| <b>White blood cell count, x10<sup>9</sup>per L</b> |                     |                      |                     |
| Media (DS)                                          | ...                 | 9,99 (4,3)           | 11,4 (6,34)         |
| Median (IQR)                                        | 8,56 (8,08-11,52)   | ...                  | ...                 |
| <b>Neutrophil count, x10<sup>9</sup> per L</b>      |                     |                      |                     |
| Media (DS)                                          | 5,23 (3,42)         | ...                  | 6,78 (5,45)         |
| Median (IQR)                                        | ...                 | 3,23 (1,96-7,54)     | ...                 |
| <b>Lymphocyte count, x10<sup>9</sup> per L</b>      |                     |                      |                     |
| Media (DS)                                          | 3,11 (2,61)         | ...                  | 4,18 (3,11)         |
| Median (IQR)                                        | ...                 | 3,13 (2,24-5,13)     | ...                 |

**Table S3.** Laboratory exams at 96, 120 and more than 120 hours form the diagnosis.

|                            | 96h              | 120h             | >120h              |
|----------------------------|------------------|------------------|--------------------|
| <b>D-dimer</b>             |                  |                  |                    |
| Yes                        | 17 (5,4%)        | 15 (4,7%)        | 39 (12,3%)         |
| <b>D-dimers dosage</b>     |                  |                  |                    |
| Media (DS)                 | ...              | ...              | ...                |
| Median (IQR)               | 1,38 (0,83-5,53) | 1,77 (0,7-3,57)  | 1 (0,44-1,64)      |
| <b>D-dimers altered</b>    |                  |                  |                    |
| Yes                        | 15 (88,2%)       | 13 (86,7%)       | 26 (66,7%)         |
| <b>Fibrinogen</b>          |                  |                  |                    |
| Yes                        | 17 (5,4%)        | 15 (4,7%)        | 36 (11,4%)         |
| <b>Fibrinogen dosage</b>   |                  |                  |                    |
| Media (DS)                 | ...              | 348,93 (145,9)   | ...                |
| Median (IQR)               | 299 (231-432)    | ...              | 292 (236,5-350,25) |
| <b>Hyperfibrinogenemia</b> |                  |                  |                    |
| Yes                        | 4 (23,5%)        | 5 (33,3%)        | 4 (11,9%)          |
| <b>Hypofibrinogenemia</b>  |                  |                  |                    |
| Yes                        | 0 (0%)           | 2 (13,3%)        | 4 (11,9%)          |
| <b>Fibrinogen altered</b>  |                  |                  |                    |
| Yes                        | 4 (23,5%)        | 7 (46,7%)        | 8 (22,2%)          |
| <b>Coagulation exams</b>   |                  |                  |                    |
| Yes                        | 14 (4,4%)        | 15 (4,7%)        | 38 (12%)           |
| <b>INR</b>                 |                  |                  |                    |
| Media (DS)                 | ...              | ...              | ...                |
| Median (IQR)               | 1,01 (0,96-1,15) | 1,08 (1,02-1,26) | 1,03 (0,99-1,11)   |
| <b>aPTT</b>                |                  |                  |                    |
| Media (DS)                 | 30,52 (4,85)     | 34,81 (7,18)     | ...                |
| Median (IQR)               | ...              | ...              | 30,55 (27,3-34,72) |
| <b>Platelets</b>           |                  |                  |                    |

|                                                     |                 |                     |                     |
|-----------------------------------------------------|-----------------|---------------------|---------------------|
| Yes                                                 | 12 (3,8%)       | 13 (4,1%)           | 35 (11,1%)          |
| <b>Platelets' count x10<sup>9</sup> per L</b>       |                 |                     |                     |
| Media (DS)                                          | 275,25 (132,28) | ...                 | ...                 |
| Median (IQR)                                        | ...             | 340,0 (234,0-637,5) | 392,0 (257,0-591,0) |
| <b>Platelets altered</b>                            |                 |                     |                     |
| Yes                                                 | 4 (33,3%)       | 6 (46,2%)           | 13 (37,1%)          |
| <b>Thrombocytopenia</b>                             |                 |                     |                     |
| Yes                                                 | 3 (25%)         | 1 (7,7%)            | 1 (2,9%)            |
| <b>Thrombocytosis</b>                               |                 |                     |                     |
| Yes                                                 | 1 (8,3%)        | 5 (38,5%)           | 12 (34,3%)          |
| <b>Blood cell count</b>                             |                 |                     |                     |
| Yes                                                 | 12 (3,8%)       | 11 (3,5%)           | 32 (10,1%)          |
| <b>White blood cell count, x10<sup>9</sup>per L</b> |                 |                     |                     |
| Media (DS)                                          | 12,09 (6,47)    | 12,67 (9,84)        | ...                 |
| Median (IQR)                                        | ...             | ...                 | 8,73 (6,86-12,14)   |
| <b>Neutrophil count, x10<sup>9</sup> per L</b>      |                 |                     |                     |
| Media (DS)                                          | 6,62 (6,68)     | ...                 | ...                 |
| Median (IQR)                                        | ...             | 3,54 (2,05-9,46)    | 3,50 (2,28-6,66)    |
| <b>Lymphocyte count, x10<sup>9</sup> per L</b>      |                 |                     |                     |
| Media (DS)                                          | 4,69 (3,37)     | 4,93 (3,22)         | ...                 |
| Median (IQR)                                        | ...             | ...                 | 3,42 (1,63-6,21)    |
